1  
2       **Secondary neurulation-fated cells in the tail bud undergo self-renewal and**  
3               **tubulogenesis regulated by a Sox2 gradient**

4  
5  
6               Teruaki Kawachi<sup>1</sup>, Eisuke Shimokita<sup>2, 4</sup>, Ryosuke Tadokoro<sup>1</sup>  
7                               and Yoshiko Takahashi<sup>1, 3, 5</sup>

8  
9    1. Department of Zoology, Graduate School of Science, Kyoto University

10 Kitashirakawa, Sakyo-ku, Kyoto

11    2. Graduate School of Biological Sciences, Nara Institute of Science and Technology,

12 8916-5, Takayama, Ikoma, Nara, 630-0192, Japan

13    3. AMED Core Research for Evolutional Science and Technology (AMED-CREST),

14 Japan Agency for Medical Research and Development (AMED), Chiyoda-ku, Tokyo

15 100-0004, Japan

16    4. Present address: Department of Anatomy and Cell Biology, Institute of Biomedical

17 Sciences Tokushima University Graduate School, 3-18-15 Kuramoto-cho, Tokushima

18 770-8503, Japan

19  
20    5. Author for correspondence:

21 Yoshiko Takahashi, PhD, Professor

22 Department of Zoology, Graduate School of Science, Kyoto University

23 Kitashirakawa, Sakyo-ku, Kyoto

24 606-8502, Japan

25 Tel: 81-75-753-4102, Fax: 81-75-753-4102

26 E-mail) yotayota@develop.zool.kyoto-u.ac.jp

1 **Abstract**

2

3 **During amniote development, anterior and posterior components of the**  
4 **neural tube form by primary neurulation (PN) and secondary neurulation (SN),**  
5 **respectively. Unlike PN, SN proceeds by the mesenchymal-to-epithelial transition**  
6 **of SN precursors in the tail bud, a critical structure for the axial elongation. Our**  
7 **direct cell labeling delineates non-overlapping territories of SN- and mesodermal**  
8 **precursors in the chicken tail bud. SN-fated precursors are further divided into**  
9 **self-renewing and differentiating cells, a decision regulated by graded expression**  
10 **levels of Sox2. Whereas Sox2 is confined to SN precursors, Brachyury (T) is widely**  
11 **and uniformly distributed in the tail bud, indicating that Sox2<sup>+</sup>/Brachyury<sup>+</sup> cells**  
12 **are neural-fated and not mesodermal. These results uncover multiple steps during**  
13 **the neural posterior elongation, including precocious segregation of SN precursors,**  
14 **their self-renewal, and regulation by graded Sox 2.**

15

## 1 **Introduction**

2           In amniotes (mammals, birds and reptiles), the neural tube is composed of a  
3 neuroepithelium that forms through two processes along the anterior posterior (AP) axis.  
4 These processes are primary neurulation (PN) and secondary neurulation (SN). The PN  
5 occurs in the anterior region of the body comprising the future brain and spinal cord in  
6 thoracic regions, where an epithelial cell sheet (neural plate) invaginates to make a  
7 tubular structure (Colas & Schoenwolf, 2001, Copp *et al.*, 2003, Saitsu *et al.*, 2004). In  
8 contrast, the SN-mediated neural tube, located posterior to the lumbar/hind limbs (in  
9 chickens and humans), is achieved by the mesenchymal-to-epithelial transition (MET)  
10 of SN precursors in the tail bud (Hughes & Freeman, 1974, Pasteels, 1937, Schoenwolf,  
11 1979, Holmdahl, 1938). The tail bud is a transient structure located at the posterior end  
12 of the embryo during axial elongation, and it continuously supplies cells to the region of  
13 the neural tube undergoing SN (designated as the secondary neural tube). The secondary  
14 neural tube eventually provides innervations that govern physiological functions for a  
15 wide variety of organs including the colon, bladder, genitalia, and tail movement (Copp  
16 *et al.*, 2015, Le Douarin & Kalcheim, 1999, Snell, 1995, Stiefel *et al.*, 2007). In addition,  
17 a failure of SN is implicated to be a cause of neural tube defects (NTDs) including *spina*  
18 *bifida*, which are among the most common congenital malformations in humans (Copp  
19 *et al.*, 2015, Copp *et al.*, 2013, Dady *et al.*, 2014, Detrait *et al.*, 2005, Greenberg *et al.*,  
20 2011, Marks & Khoshnood, 1998). It is therefore important to elucidate the mechanisms  
21 by which the secondary neural tube formation is regulated. However, the ways that the  
22 SN precursors accomplish the tasks of neural differentiation and tubular morphogenesis  
23 remain poorly understood.

24           The tail bud also provides cells that form the paraxial mesoderm of the  
25 posterior embryo, as well as the midline components of the notochord and floor plate  
26 during the axial elongation (Cambray & Wilson, 2002, Catala *et al.*, 1996, Catala *et al.*,  
27 1995). However, how these different lineages become specifically located in the tail bud  
28 remains undetermined, although several different hypotheses have been proposed. A  
29 main reason for our ignorance is that cells constituting the tail bud are mesenchymal in  
30 shape, hampering morphological delineation between the lineages (Colas & Schoenwolf,  
31 2001, McGrew *et al.*, 2008). To solve this long-standing question, a cell-labeling  
32 technique that directly visualizes SN precursors must be useful.

33           We previously used direct cell labeling in the embryonic chicken tail bud

1 (Shimokita & Takahashi, 2011) to show that SN-precursors are derived from a specific  
2 region of the epiblast, called the presumptive SN (preSN). This preSN is located along  
3 the midline posterior to the Hensen's node at Hamburger and Hamilton stage 8 (HH 8;  
4 Fig. 1A-D). The preSN at this stage is unique for two features. First, this specific region  
5 of epiblast is not underlain by the primitive streak. Rather, the anterior end of the  
6 primitive streak is apart posteriorly from the preSN by 200-250  $\mu\text{m}$  (Fig. 1A). Second,  
7 the preSN lacks the underlying basement membrane, thereby allowing preSN-epithelial  
8 cells to ingress by the epithelial-to-mesenchymal transition (EMT) in a manner similar  
9 to mesodermal ingression from the primitive streak. Labeling either by DiI or by  
10 EGFP-electroporation revealed that the preSN-derived ingressed cells constitute the tail  
11 bud where they remain mesenchymal until they are incorporated into the secondary  
12 neural tube (Shimokita & Takahashi, 2011). Little or no mesodermal cells are derived  
13 from the preSN region.

14 By extending these findings, we noticed that despite the massive elongation of  
15 the secondary neural tube that continuously receives SN precursors, the amount of  
16 labeled SN precursors in the tail bud remains constant as seen at HH14 (23ss) and  
17 HH17 (30ss) (Fig. 1B-D). This raised the possibility that SN precursors would possess a  
18 self-renewing ability in the tail bud. In this study, we have tested this possibility by  
19 following a precise delineation of the SN-fated cell population in the tail bud. We have  
20 found that the SN-precursors in the tail bud are composed of two groups of cells,  
21 self-renewing cells and neural-specified transitional cells. The SN precursor territory  
22 including these two subpopulations expresses both Sox 2 and Brachyury, with the Sox 2  
23 level decreasing posteriorly. This Sox 2 gradient plays roles in the regulation of SN  
24 precursors in the tail bud.

25

## 26 **Material and Methods**

### 27 **Chicken embryos**

28 Fertilized chicken eggs were obtained from Shiroyama poultry farm  
29 (Sagamihara, Japan). Embryos were staged according to Hamburger and Hamilton  
30 (Hamburger & Hamilton, 1951) or the somite number. All animal experiments were  
31 conducted with the ethical approval by Kyoto University (No. H2620).

32

33

## 1 **Vector constructions**

2 pCAGGS-EGFP was as previously described (Momose *et al.*, 1999). cDNAs  
3 encoding Sox2 and Sox3HMG-EnR were provided by Drs. K. Fukuda (Tokyo  
4 Metropolitan University) and Y. Sasai (CDB Riken), respectively. The cDNAs were  
5 individually subcloned into the Mlu I-Nhe I site of pBI-EGFP or pBI-DsRed vector  
6 (Watanabe *et al.*, 2007).

## 7 8 ***In ovo* electroporation**

9 An anode and cathode were prepared with a platinum wire (diameter of 0.3–  
10 0.5 mm) and a sharpened tungsten needle (40 µm diameter at the tip), respectively. The  
11 *in ovo* electroporation was carried out at HH8 according to the method previously  
12 reported (Momose *et al.*, 1999, Nakaya *et al.*, 2004) with slight modifications: the  
13 anode was inserted in between the embryo and yolk, and a DNA solution containing 2%  
14 fast green FCF (Nakarai) was laid on the epiblast, followed by electric charges five  
15 times of 5 V, 25 ms with 100 ms intervals (Electro Square Porator ECM830; BTX)  
16 using the cathode. Maximal attention was paid so that the DNA solution did not spread  
17 into the primitive streak, from which mesoderm arises.

18

## 19 **PKH-labeling**

20 The presumptive SN region in the epiblast or primitive streak of HH 8 (6  
21 somites stage) embryos were labeled with PKH26 Red Fluorescent Cell Linker (Sigma)  
22 or PKH67 Green Fluorescent Cell Linker (Sigma) using a micropipette pulled from a 1  
23 mm glass capillary in a vertical micropipette puller (model PC-10; Narishige).

24

## 25 ***In situ* hybridization**

26 Whole-mount *in situ* hybridization was performed as previously described  
27 (Henrique *et al.*, 1995, Atsuta & Takahashi, 2015) with some modifications. Embryos  
28 were fixed overnight in phosphate-buffered saline, PBS (0.1M Tris-HCl [pH 7.5],  
29 0.15M NaCl) containing 4% paraformaldehyde (PFA), 100 mmol/L 3-(N-morpholino)  
30 propanesulfonic acid (MOPS) (pH 7.4), 2 mmol/L ethylene glycol tetraacetic acid  
31 (EGTA), and 1 mmol/L MgSO<sub>4</sub>·7H<sub>2</sub>O. After washing twice in 0.1 % Tween 20 in PBS  
32 (PBST), specimens were dehydrated by a successively graduated series of methanol in  
33 PBST (40%–100%). They were subsequently treated with proteinase K (20 µg/mL) for

1 15 min, followed by refixation in 4% PFA in PBS for 20 min at room temperature (RT).  
2 After two PBST washes, the embryos were transferred to hybridization buffer  
3 (ULTRAhyb, Ambion) and prehybridized for 1 hr at 68 °C. Hybridization was carried  
4 out overnight at 68 °C in the hybridization buffer containing a digoxigenin  
5 (DIG)-labeled RNA probe. The embryos were washed three times for 30 min each in  
6 50% formamide, 5 x standard saline citrate (SSC), 1% ethylenediaminetetraacetic acid  
7 (EDTA), 0.2% Tween 20, 0.5% 3-[(3-Cholamidopropyl) dimethylammonio]  
8 propanesulfonate (CHAPS), at 68 °C. They were further washed in 0.1 mol/L Maleic  
9 Acid (pH 7.4), 0.15 mol/L NaCl, 1% Tween 20 (MABT) at least three times, prior to  
10 preblocking in 2% BBR in MABT. Hybridization was carried out by incubating  
11 embryos in blocking solution, which contained alkaline phosphatase-conjugated  
12 anti-DIG antibody (Roche), overnight. After the embryos were extensively washed in  
13 MABT for at least 5 h with several changes of solutions, they were processed to NTMT  
14 (100 mmol/L Tris-HCl [pH 9.5], 100 mmol/L NaCl, 50 mmol/L MgCl<sub>2</sub>, 0.1% Tween  
15 20). The alkaline phosphatase activity was visualized by incubating embryos in NTMT  
16 containing 0.45 mg/mL nitroblue-tetrazolium chloride (Roche) and 0.175 mg/mL  
17 5-bromo-4-chloro-3-indolyl phosphatase (Roche). After stopping the color reaction,  
18 embryos were post-fixed in 0.1% glutaraldehyde /4% PFA in PBS for 30 min at 4 °C.

19

## 20 **Immunohistochemistry**

21 Embryos were fixed for 2 hours in PBS containing 3 % PFA at 4°C, followed  
22 by preparation of cryostat sections 10 µm thick. The detection of the Sox2 or Brachyury  
23 proteins (T) was performed as follows: after pre-blocking with 2 % blocking reagent  
24 (Roche)/PBS for 1 hr at RT, the sections were incubated at 4 °C overnight with either of  
25 the following antibodies in 1% blocking reagent (BBR, Roche)/PBS: anti-Sox2 mouse  
26 polyclonal antibody (ab5603; Millipore) (Oginuma *et al.*, 2017) diluted 1:100, and  
27 anti-Brachyury goat polyclonal antibody (AF2018; R&D Systems) (Nakanoh *et al.*,  
28 2017) diluted 1:100, anti-Fibronectin antibody (F3648; Sigma) (Yoshino *et al.*, 2014),  
29 anti-GFP antibody (11814460001, Roche) diluted 1:300. After washing three times in  
30 PBST, the specimens were reacted with either of the following second antibodies:  
31 anti-rabbit IgG-Alexa 568 conjugated donkey antibody (A10042, Invitrogen), anti-goat  
32 IgG-Alexa 488 conjugated donkey antibody (A11055, Invitrogen), anti-rabbit  
33 IgG-Alexa 647 conjugated donkey antibody (A31573, Invitrogen), anti-mouse

1 IgG-Alexa 488 conjugated donkey antibody (R37114, Invitrogen) diluted 1:400 with  
2 1% blocking reagent /PBS for 1 hr at RT. The reaction was terminated by washing three  
3 times in PBS, and the sections were sealed by VectaShield (Funakoshi).

## 4 5 **Results**

### 6 **SN precursors are segregated from mesodermal cells in the tail bud at HH14**

7 To precisely locate the SN precursors and other lineages in the tail bud, we  
8 labeled the preSN region by PKH 67 (green) and the anterior primitive streak by  
9 PKH26 (red) in a single HH8 embryo having 6-somite (6ss). Dorsal views of these  
10 embryos at HH14 (24ss) showed a domain of preSN-derived cells that was distinct from  
11 that of anterior primitive streak-derived paraxial mesodermal precursors in the tail bud  
12 (Fig. 1A-D, n=123; Fig. 1E, F, n=26). The preSN-derived cells remained restricted to  
13 the secondary neural tube-forming territory with little, if any, contribution to the  
14 mesoderm. In sagittal histological sections, the reciprocal segregation is also obvious  
15 between the SN- and mesodermal populations in the tail bud: SN precursors (green)  
16 occupy the anterior half of the tail bud with the posterior half being populated by  
17 mesodermal cells (red) (Fig. 1G-J, n=12). As expected, neither SN- nor paraxial  
18 mesodermal precursors were found in the chord neural hinge (CNH), known to give rise  
19 specifically to the notochord and floor plate (Catala *et al.*, 1995). These observations  
20 demonstrate that a vast majority of cells of the tail bud are differentially fated at least at  
21 HH14. The segregation between SN- and mesoderm territories in the tail bud was  
22 retained at HH17 (30ss), where mesodermal population was located more ventrally to  
23 the SN precursors, and was not overtly visible in the dorsal view (Fig. 1D; n=4).

### 24 25 **SN precursors in the tail bud contain self-renewing cells**

26 Since SN precursors are constantly present in the tail bud during the  
27 secondary neural tube elongation, we reasoned that these precursors contain  
28 self-renewing cells. To test this, we prepared HH17 (30ss) embryos in which SN  
29 precursors had been EGFP-labeled (Fig. 2A). From these EGFP-embryos, a piece was  
30 dissected from the SN precursor domain of the tail bud, and transplanted into the  
31 corresponding region of the tail bud at the presumptive 30-32 somite level of a  
32 non-electroporated HH14 embryo (24ss) (Fig. 2A-D; n=8). Even though the  
33 experimental approaches in this study allowed us to specifically trace the EGFP-labeled

1 SN-precursors, we paid maximal attention not to take contamination of unlabeled  
2 ventral cells in the tail bud that contain CNH and some paraxial mesoderm-fated cells.

3 When these manipulated embryos were allowed to develop until HH17 (30ss),  
4 EGFP-positive cells were, as expected, found in the epithelialized neural tube posterior  
5 to somite level 31-33. Importantly, EGFP signals were also detected in the  
6 mesenchymal population in the tail bud (Fig. 2C, E; 6 out of 8). We further performed a  
7 serial transplantation to a third host embryo (Fig. 3F, G; n=6), and observed again  
8 EGFP-positive cells both in the secondary neural tube posterior to the 31-33 somite  
9 level and in the tail bud (4 out of 6). These results indicate the existence of  
10 self-renewing SN precursors in the tail bud.

11 To more precisely locate these self-renewing cells in the SN precursor  
12 territory of the tail bud, we performed similar experiments, but this time we separated  
13 the anterior and posterior halves of the SN precursor domain, and transplanted each of  
14 them into its equivalent domain of stage-matched embryos (HH14). When the anterior  
15 half was transplanted, EGFP-positive cells were found solely in the differentiated neural  
16 tube posterior to the presumptive somite level 31-33 in HH17 embryos (Fig. 2J-L; 6 out  
17 of 7). In clear contrast, EGFP-cells from the posterior half of the SN precursor domain  
18 were found in both the epithelialized neural tube and undifferentiated mesenchymal  
19 population in the tail bud (Fig. 2M-O; 5 out of 7). Thus, SN precursors in the tail bud  
20 are subdivided at least into two different subpopulations: one is anteriorly located and  
21 specified to neural epithelialization/differentiation; and the other is the compartment of  
22 posterior cells maintained as undifferentiated. When the posterior half was transplanted,  
23 EGFP-positive cells in the secondary neural tube were located posteriorly to somite pair  
24 35 and not to somite pairs 31-33, thereby suggesting that it takes 3-6 hrs for the  
25 self-renewing cells to be incorporated to the forming neural tube (one cycle of somite  
26 segmentation is 90 min in chickens) (Palmeirim *et al.*, 1997).

### 27 28 **Graded expression of Sox 2 in SN precursors**

29 To explore the molecular mechanisms by which the two different  
30 subpopulations of SN precursors are regulated and distinguished, we paid attention to  
31 the expression of the *Sox2* gene, known to be active at the earliest stages of PN and SN  
32 neural tube formation (Uchikawa *et al.*, 2011). Indeed, the presence of *Sox2* mRNA is  
33 concomitant with neural epithelialization during the SN process (Shimokita &



1 Takahashi, 2011). In the current study, we carefully examined expression levels of Sox  
2 2 in the tail bud of HH14 (23ss) chicken embryos. In situ hybridization for *Sox2* mRNA  
3 revealed expression in the *anterior* domain of SN precursors, whereas signals were  
4 barely detectable in the *posterior* domain (Fig. 3A, B; n=6). We therefore switched to  
5 immunohistochemistry using anti-Sox2 antibody, allowing sensitive detection of the  
6 Sox2 protein. Confocal microscopic analyses virtualized nuclear Sox2 protein both in  
7 the anterior and posterior domains of SN precursors with graded signals decreasing  
8 posteriorly. This notion was supported by the quantitative evaluation (Fig. 3C, F; n=15).

9 We also compared the staining pattern of Sox2 with that of Brachyury (T)  
10 protein in the tail bud of HH14 embryos. It was previously shown that in very early  
11 mouse embryos, a specific epiblastic region that gives rise to both neural and  
12 mesodermal progenitors (NMPs) expresses both Sox2 and Brachyury (Bra), and since  
13 then, the Sox2<sup>+</sup>/Bra<sup>+</sup> double-positive signal has been proposed as a marker for NMPs  
14 (Olivera-Martinez *et al.*, 2012, Wymeersch *et al.*, 2016, Gouti *et al.*, 2014). Contrasting  
15 with these proposals, we found that the Brachyury protein was widely distributed in the  
16 tail bud as shown in the sagittal section in Fig. 3D (n=10). Most importantly, the Bra<sup>+</sup>  
17 region included the Sox2<sup>+</sup> precursor territory, that is, almost the entire anterior half of  
18 the Bra<sup>+</sup> domain was Sox2<sup>+</sup>/Bra<sup>+</sup> double positive. Furthermore, unlike Sox2, the signal  
19 intensity of Bra was relatively uniform throughout in the tail bud, although it dropped  
20 abruptly following neural epithelialization, as expected (Fig. 3G; n=6). Thus, the  
21 mesenchymal cells of the HH14 tail bud were positive for Bra regardless of their  
22 developmental fate.

23 To further corroborate our observation that Sox2 expression was restricted to  
24 the neural fate in the tail bud, we double stained a sagittal section of HH14 tail bud for  
25 the Sox2 protein (red) and the fate of the anterior primitive streak-derived mesoderm  
26 (PKH-labeling). As expected, the mesoderm territory was negative for Sox2 (Fig. 3H;  
27 n=14).

28 These results revealed an intimate correlation between the differential levels  
29 Sox2 expression and different states of SN precursors in the tail bud: low and high  
30 levels of Sox 2 for self-renewing- and SN-specified populations, respectively.

31  
32 **Augmented level of Sox 2 expression directed SN precursors to precocious**  
33 **differentiation/epithelialization**

1 To know whether differential levels Sox2 expression are functionally related  
2 to the two groups SN precursors, we experimentally elevated the level of Sox2  
3 expression in these cells. Similar to the experiments shown in Fig 1, the *in ovo*  
4 electroporation was carried out at HH8 (6ss) to target the preSN epiblastic region.  
5 However, if the overexpressed Sox 2 inhibited EMT/ingression of the epiblast, the  
6 electroporated cells would end up in neural epithelia at later stages, which might  
7 mislead interpretation. To avoid this possible confusion, we switched on the Sox2  
8 expression after the electroporated preSN-derived cells ingressed as mesenchyme, using  
9 the Tet-on expression system (Watanabe, et al., 2007).

10 As shown in Fig. 4A, three plasmids were co-electroporated:  
11 pCAGGS-mCherry (constitutively active), pBI-Sox2/EGFP (BI, previously called TRE,  
12 is a bidirectional promoter induced by doxycycline, an analog of tetracycline; Dox), and  
13 pCAGGS-Tet-On 3G (transcriptional activator which binds the tetracycline responsive  
14 element (TRE) only in the presence of Dox). When electroporated embryos reached  
15 HH14 (22ss), a Dox solution was administered. At the time of administration (0 hr), a  
16 decent amount of ingressed cells were already found in the tail bud, which expressed  
17 mCherry but not EGFP (Fig. 4A, B, E; n=7).

18 By 3 hrs post Dox at HH14 (24ss), EGFP/Sox2 started to be expressed in SN  
19 precursors in the tail bud, which is consistent with the previous report that a TRE-driven  
20 gene starts to be expressed after 3 hr of Dox injection (Watanabe, et al., 2007). It is  
21 known that the *in ovo* electroporation in chickens yields a mosaic pattern of transfected  
22 cells, and also that if two different plasmids, mCherry and EGFP, are co-electroporated,  
23 three types of transfected cells emerge: one double positive (mCherry<sup>+</sup>/EGFP<sup>+</sup>), and two  
24 single positives (mCherry<sup>+</sup>/EGFP<sup>-</sup> or mCherry<sup>-</sup>/EGFP<sup>+</sup>). Indeed, at 3 hrs post Dox, these  
25 three types of cells were observed in *EGFP/Sox2*-electroporated SN precursors in the  
26 tail bud, which was comparable to EGFP-electroporated control cells. (Fig. 4A, C, F;  
27 n=7).

28 In contrast to 3 hrs, at 9 hrs post Dox, that is 6 hrs after the onset of Sox 2  
29 expression, distribution patterns of *EGFP/Sox2*-electroporated SN precursors were  
30 significantly different from those in control *EGFP*-electroporated embryos. In the  
31 control tail bud, all the three types, mCherry<sup>+</sup>/EGFP<sup>+</sup>, mCherry<sup>+</sup>/EGFP<sup>-</sup> and  
32 mCherry<sup>-</sup>/EGFP<sup>+</sup> cells, were observed (Fig. 4E, F; n=7). However, in  
33 *EGFP/Sox2*-electroporated embryos, only mCherry<sup>+</sup> but no EGFP<sup>+</sup> cells were detected

1 in the tail bud (Fig. 4J, K; n=11). In addition, although the anteriorly formed neural tube  
2 contained double-positive mCherry<sup>+</sup>/EGFP<sup>+</sup> cells, and single positive mCherry/EGFP<sup>+</sup>  
3 or mCherry<sup>+</sup>/EGFP<sup>-</sup> cells, the nasant area of epithelialized cells at the boundary between  
4 the tail bud was preferentially occupied only by mCherry<sup>+</sup>/EGFP<sup>-</sup> cells (Fig 4. J, K, near  
5 white arrow). Since we observed no sign of apoptosis in the tail bud in these embryos  
6 (not shown), it is most likely that the Sox2-elevated SN precursors underwent  
7 precocious differentiation/epithelialization.

### 8 9 **Inhibition of Sox2 prevented both differentiation/epithelialization and self-renewal** 10 **ability of SN precursors**

11 We further asked whether Sox2-deprived SN precursors would remain in a  
12 self-renewing state in the tail bud. To this end, we used Sox3HMG-EnR, known to  
13 repress endogenous Sox B type genes (Sox 1 to Sox 3) (Bylund *et al.*, 2003, Sasai,  
14 2001). Since SN precursors in the tail bud express Sox2, but not Sox1 or Sox3  
15 (Uchikawa *et al.*, 2011), electroporated Sox3HMG-EnR was considered to repress the  
16 activity of Sox 2. Using the Tet-on expression system shown in Fig. 4, *Sox3HMG-EnR*  
17 was Dox-induced to be expressed in a temporally controlled manner. This time, we  
18 electroporated pBI-Sox3HMG-EnR/ DsRed (which are driven bidirectionally by TRE),  
19 pCAGGS-EGFP, and pCAGGS-Tet-On3G. In addition, to precisely track the  
20 *Sox3HMG-EnR*-electroporated cells during secondary neural tube formation, we  
21 dissected gene-electroporated SN precursors from a tail bud of HH14 (22ss) embryo,  
22 and transplanted them homotopically into stage-matched non-electroporated embryos,  
23 into which Dox solution had been administered (Fig. 5A, B; n=5).

24 By 12 hrs post Dox, when embryos reached HH16, DsRed (Sox3HMG-EnR)  
25 signals were detected (the onset of DsRed detection after Dox was delayed compared to  
26 mCherry due to the protein configuration) (Fig. 5A, C; n=5). Notably, at this stage, only  
27 a few DsRed<sup>+</sup> cells were recognized in the tail bud probably due to the cell death of  
28 *Sox3HMG-EnR*-expressing cells, and even this remnant of remaining cells failed to  
29 participate in the secondary neural tube (Fig. 5C, D; n=5). It clearly contrasts with the  
30 observations shown in Fig 2, where transplanted EGFP<sup>+</sup> (normal) cells were actively  
31 incorporated into the secondary neural tube. It is unlikely that Sox2-inhibited cells were  
32 converted to mesoderm. In transverse sections, Sox 2-inhibited cells (red) in the anterior  
33 domain of SN precursors, which would normally express a high level of Sox 2, were

1 located near the neural tube within the territory of SN precursors (Fig. 5E, F; n=4).  
2 These sections also confirmed that the posterior domain of SN precursors, which would  
3 normally be of low Sox 2, did not contain Sox 2-inhibited cells (Fig. 5D', G, H; n=4).  
4 The distribution of single positive EGFP<sup>+</sup> cells, which did not receive the  
5 *Sox3HMG-EnR* gene, was comparable to normal cells (Fig. 5D compare to Fig. 2; n=4).  
6 Collectively, these results suggest that a high level of Sox2 is required for the anterior  
7 SN precursors to correctly be incorporated into the secondary neural tube. And even the  
8 low level of Sox 2 activity in the posterior SN precursors is indispensable, particularly  
9 for the self-renewing cells to survive.

10         The loss of *Sox3HMG-EnR*-electroporated cells was specific to SN precursors  
11 since when the expression of this gene was Dox-induced in already epithelialized cells  
12 in the secondary neural tube, no detectable effects were seen until HH16 (Fig. 5I; n=7).

13

#### 14 **Discussion**

15         Using the direct labeling of SN precursors, SN-specific transplantations, and  
16 SN-specific gene manipulations, we have uncovered cellular and molecular mechanisms  
17 underlying the SN-mediated neural elongation in the posterior region of chicken  
18 embryos. SN precursors occupy the anterior half of the tail bud at HH14, whereas the  
19 posterior half is populated by paraxial mesodermal precursors. The SN precursor  
20 territory was further divided into two distinct regions; one is its posterior half with  
21 self-renewing cells, and the other is the anterior half more specified to the neural  
22 tubulogenesis (Fig. 6). Sox2 plays an important role in the regulation of these two  
23 distinct states of cells: high and low levels of Sox2 activities endow the neural-specified  
24 and self-renewing states, respectively.

25

#### 26 **A discrete territory of SN precursors in the tail bud**

27         The tail bud has long been appreciated to be critical for the posterior body  
28 elongation, and the existence of precursors has been shown that give rise to the  
29 secondary neural tube, and/or paraxial mesoderm, and the chord neural hinge (CNH),  
30 although their precise positions in the tail bud have been under debates (Cambray &  
31 Wilson, 2002, Catala *et al.*, 1996, Catala *et al.*, 1995, McGrew *et al.*, 2008, Selleck &  
32 Stern, 1991, Olivera-Martinez *et al.*, 2012, Tucker & Slack, 1995). Recent advances in  
33 genetic labeling of earlier epiblast cells in mice proposed that neuromesodermal

1 common progenitors (NMPs) exist not only in the early epiblast but also in the tail bud  
2 (Tzouanacou *et al.*, 2009, Wymeersch *et al.*, 2016). However, no direct fate mapping of  
3 the tail bud-constituting cells has been conducted in amniotes.

4 In this study, we have extended our previous findings that the SN precursors  
5 can directly be traced in the tail bud (Shimokita and Takahashi, 2011). These SN  
6 precursors derive from the preSN region in the epiblast at HH8, which is located in  
7 between Hensen's node and the anterior end of the primitive streak (Fig. 1). By  
8 focusing on the tail bud at HH14 (24ss), which displays a representative feature of this  
9 structure, we have delineated SN- and mesoderm-harboring regions. The SN precursors  
10 occupy the anterior half, whereas the posterior half is populated by mesodermal cells  
11 derived from the anterior primitive streak, leaving the CNH unlabeled (Fig. 1J). This  
12 delineation is striking to us because several previous studies of axial elongation  
13 postulated prominent NMPs in the tail bud, although these studies traced more naïve  
14 cells residing in the epiblast at earlier stages than those used in the current study  
15 (Selleck & Stern, 1991, Wymeersch *et al.*, 2016, Taniguchi *et al.*, 2017). Thus, our  
16 study clarified, for the first time, different fates of mesenchymal cell populations in the  
17 tail bud, at least at the HH14 (24ss) stage. Our results do not exclude the existence of  
18 NMPs in the tail bud, since preSN-labeling rarely yields cells located in the medial edge  
19 of presomitic mesoderm (see Fig. 4E). Nevertheless, a vast majority of the tail bud cells  
20 are differentially fated to either SN, mesoderm, or CNH.

## 21 22 **Posteriorly positioned SN precursors possess self-renewing ability**

23 The SN precursors are constantly present in the tail bud despite their  
24 continuous participation in the secondary neural tube formation, and we had reasoned  
25 that SN precursors in the tail bud might contain stem (-like) cells. Specific tracing of the  
26 SN precursors in the tail bud has facilitated to test this, and we have indeed shown that  
27 such stem cells exist in the tail bud by a serial transplantation of EGFP-labeled SN  
28 precursors (Fig. 2A). Furthermore, these self-renewing cells are preferentially located in  
29 the posterior half of the SN precursor territory (Fig. 2, Fig. 6). These posterior cells  
30 undergo both self-renewal and its subsequent neural tubulogenesis (epithelialization),  
31 whereas the anterior half cells only participate in the tubulogenesis without staying in  
32 the tail bud. Thus, the SN precursors contain at least two subpopulations, one is  
33 posteriorly positioned self-renewing cells, and the other is anteriorly located cells in a

1 transitional state (Fig. 6). This is the first identification of SN stem cell population in  
2 the tail bud. Whether a single stem cell generates both self- and differentiating cells  
3 awaits further analyses.

#### 4 5 **AP gradient of Sox2 expression regulates the binary decision between** 6 **self-renewing and transitional states of SN precursors**

7 Sox2 displays a posteriorly decreasing gradient of expression within the SN  
8 precursor territory in the tail bud, which contrasts with a relatively steady level of  
9 Brachyury (T) expression both in the SN- and mesodermal precursors (Fig. 3). We have  
10 provided evidence that the AP gradient of Sox2 is important for the binary decision  
11 between the self-renewing and transitional states of SN precursors. With  
12 gain-of-function experiments, we have found that a high level of Sox2 directs cells to  
13 the differentiation/epithelialization of the secondary neural tube. Loss-of-function  
14 experiments have unexpectedly shown that even a low level of Sox2 is important for the  
15 posterior SN precursors. Sox2 has been implicated in normal neural development,  
16 pluripotency of stem cells, and survival of neural progenitors (Feng *et al.*, 2013, Hagey  
17 & Muhr, 2014, Hutton & Pevny, 2011, Kondoh & Lovell-Badge, 2016). In particular, a  
18 low level of Sox2 is important for the proliferation of neural stem cells in adult brain  
19 (Hagey & Muhr, 2014). It is possible that the self-renewing SN precursors identified in  
20 the current study might serve as a novel source for therapeutic treatments of neural  
21 diseases.

22 It is yet to be determined what generates the AP gradient of Sox 2 expression  
23 in the SN precursor territory. It is known that the preSN region in the epiblast of HH8  
24 embryo, from which SN precursors arise, is devoid of Sox2, although its adjacent neural  
25 plate/epiblast (i.e. primary neurulation tissues) expresses this gene, and also that this  
26 preSN-specific inactivation of Sox2 requires BMP4 (Takemoto *et al.*, 2006). It is  
27 conceivable that the AP gradient of Sox 2 expression in the tail bud is also regulated by  
28 BMPs expressed in the tail bud and its surrounding tissues (Takemoto *et al.*, 2006).

29 Previous studies of axial elongation have regarded Sox2<sup>+</sup>/Bra<sup>+</sup> double positive  
30 signal as a marker for an NMPs cell population in the early epiblast (Olivera-Martinez  
31 *et al.*, 2012, Wymeersch *et al.*, 2016, Delfino-Machin *et al.*, 2005, Tsakiridis *et al.*,  
32 2014, Yoshida *et al.*, 2014). However, in the current study, we have explicitly  
33 demonstrated that a majority of the SN precursors in the tail bud are Sox2<sup>+</sup>/Bra<sup>+</sup>

1 double-positive, even though they are *not* NMPs. Thus, the fate of Sox2<sup>+</sup>/Bra<sup>+</sup> double  
2 positive cells must vary according to the developmental context. It is also possible that  
3 Sox2<sup>+</sup>/Bra<sup>+</sup> cells might have high potential to easily change their fate upon encountering  
4 external signals. We are currently investigating differentiation potential of SN- and  
5 paraxial mesodermal precursors in the tail bud based on the developmental lineages  
6 delineated in the current study.

7 Lastly, it is of interest speculating that the self-renewing ability of the SN  
8 precursors might reflect the stemness of adjacent mesoderm (Iimura & Pourquie, 2006).  
9 When mesodermal cells that are derived from the anterior primitive streak of HH4-6  
10 embryos give rise to the medial half of somites, they do so via the tail bud where some  
11 of these cells stay for a long period of time and serve as self-renewing cells (Iimura &  
12 Pourquie, 2006). According to our findings, such mesodermal stem cells should be  
13 those located in the posterior half of the tail bud at HH14, and more ventrally at HH17  
14 (Fig. 1). In this way, both the mesodermal stem cells contributing to the medial half of  
15 somites and the SN stem cells found in this study are possibly adjacent to each other in  
16 the tail bud (Fig. 6). It is plausible that these differentially fated but similarly  
17 self-renewing cells would share signals for the endowment of the stemness. Whether  
18 these signals include Fgfs and Wnts, which are predominantly expressed in the posterior  
19 region of the elongating body awaits further analyses.

20

## 21 **Acknowledgements**

22 We thank Dr. Scott F. Gilbert for helpful discussion and careful reading of  
23 the manuscript. We thank Drs. Y. Sasai (RIKEN, deceased) and K. Fukuda (Tokyo  
24 Metropolitan University) for kind gifts of Sox3HMG-EnR and Sox 2, respectively.  
25 This work was supported by JSPS KAKENHI: Grant-in-Aid for Scientific Research  
26 (B), SPIRITS (Kyoto University), and AMED (JP17gm0610015). T.K. and E. S. were  
27 fellows of JSPS (DC1).

28

## 29 **References**

30 Atsuta, Y. & Takahashi, Y. 2015. FGF8 coordinates tissue elongation and cell  
31 epithelialization during early kidney tubulogenesis. *Development (Cambridge,*  
32 *England)*, **142**, 2329-2337.  
33 Bylund, M., Andersson, E., Novitch, B. G. & Muhr, J. 2003. Vertebrate neurogenesis is

- 1 counteracted by Sox1-3 activity. *Nature neuroscience*, **6**, 1162-1168.
- 2 Cambray, N. & Wilson, V. 2002. Axial progenitors with extensive potency are localised  
3 to the mouse chordoneural hinge. *Development (Cambridge, England)*, **129**,  
4 4855-4866.
- 5 Catala, M., Teillet, M. A., De Robertis, E. M. & Le Douarin, M. L. 1996. A spinal cord  
6 fate map in the avian embryo: while regressing, Hensen's node lays down the  
7 notochord and floor plate thus joining the spinal cord lateral walls. *Development*  
8 *(Cambridge, England)*, **122**, 2599-2610.
- 9 Catala, M., Teillet, M. A. & Le Douarin, N. M. 1995. Organization and development of  
10 the tail bud analyzed with the quail-chick chimaera system. *Mechanisms of*  
11 *development*, **51**, 51-65.
- 12 Colas, J. F. & Schoenwolf, G. C. 2001. Towards a cellular and molecular understanding  
13 of neurulation. *Dev Dyn*, **221**, 117-145.
- 14 Copp, A. J., Adzick, N. S., Chitty, L. S., Fletcher, J. M., Holmbeck, G. N. & Shaw, G.  
15 M. 2015. Spina bifida. *Nat Rev Dis Primers*, **1**, 15007.
- 16 Copp, A. J., Greene, N. D. & Murdoch, J. N. 2003. The genetic basis of mammalian  
17 neurulation. *Nat Rev Genet*, **4**, 784-793.
- 18 Copp, A. J., Stanier, P. & Greene, N. D. 2013. Neural tube defects: recent advances,  
19 unsolved questions, and controversies. *Lancet Neurol*, **12**, 799-810.
- 20 Dady, A., Havis, E., Escriou, V., Catala, M. & Duband, J. L. 2014. Junctional  
21 neurulation: a unique developmental program shaping a discrete region of the  
22 spinal cord highly susceptible to neural tube defects. *J Neurosci*, **34**,  
23 13208-13221.
- 24 Delfino-Machin, M., Lunn, J. S., Breikreuz, D. N., Akai, J. & Storey, K. G. 2005.  
25 Specification and maintenance of the spinal cord stem zone. *Development*  
26 *(Cambridge, England)*, **132**, 4273-4283.
- 27 Detrait, E. R., George, T. M., Etchevers, H. C., Gilbert, J. R., Vekemans, M. & Speer,  
28 M. C. 2005. Human neural tube defects: developmental biology, epidemiology,  
29 and genetics. *Neurotoxicol Teratol*, **27**, 515-524.
- 30 Feng, R., Zhou, S., Liu, Y. et al. 2013. Sox2 protects neural stem cells from apoptosis  
31 via up-regulating survivin expression. *The Biochemical journal*, **450**, 459-468.
- 32 Gouti, M., Tsakiridis, A., Wymeersch, F. J. et al. 2014. In vitro generation of  
33 neuromesodermal progenitors reveals distinct roles for wnt signalling in the



- 1 specification of spinal cord and paraxial mesoderm identity. *PLoS biology*, **12**,  
2 e1001937.
- 3 Greenberg, J. A., Bell, S. J., Guan, Y. & Yu, Y. H. 2011. Folic Acid supplementation  
4 and pregnancy: more than just neural tube defect prevention. *Rev Obstet*  
5 *Gynecol*, **4**, 52-59.
- 6 Hagey, D. W. & Muhr, J. 2014. Sox2 acts in a dose-dependent fashion to regulate  
7 proliferation of cortical progenitors. *Cell reports*, **9**, 1908-1920.
- 8 Hamburger, V. & Hamilton, H. L. 1951. A series of normal stages in the development  
9 of the chick embryo. *Journal of morphology*, **88**, 49-92.
- 10 Henrique, D., Adam, J., Myat, A., Chitnis, A., Lewis, J. & Ish-Horowicz, D. 1995.  
11 Expression of a Delta homologue in prospective neurons in the chick. *Nature*,  
12 **375**, 787-790.
- 13 Holmdahl, D. E. 1938. Die Morphogenese des Vertebratorganismus vom formalin und  
14 experimentellen Gesichtspunkt. *Roux's Arch. Dev. Biol.*, **139**, 191-226.
- 15 Hughes, A. F. & Freeman, R. B. 1974. Comparative remarks on the development of the  
16 tail cord among higher vertebrates. *J Embryol Exp Morphol*, **32**, 355-363.
- 17 Hutton, S. R. & Pevny, L. H. 2011. SOX2 expression levels distinguish between neural  
18 progenitor populations of the developing dorsal telencephalon. *Developmental*  
19 *biology*, **352**, 40-47.
- 20 Iimura, T. & Pourquie, O. 2006. Collinear activation of Hoxb genes during gastrulation  
21 is linked to mesoderm cell ingression. *Nature*, **442**, 568-571.
- 22 Kondoh, H. & Lovell-Badge, R. 2016. "Sox2". *ACADEMIC PRESS*.
- 23 Le Douarin, N. M. & Kalcheim, C. 1999. "The Neural Crest" 2nd ed. *Cambridge*  
24 *University Press*.
- 25 Marks, J. D. & Khoshnood, B. 1998. Epidemiology of common neurosurgical diseases  
26 in the neonate. *Neurosurg Clin N Am*, **9**, 63-72.
- 27 Mcgrew, M. J., Sherman, A., Lillico, S. G. et al. 2008. Localised axial progenitor cell  
28 populations in the avian tail bud are not committed to a posterior Hox identity.  
29 *Development (Cambridge, England)*, **135**, 2289-2299.
- 30 Momose, T., Tonegawa, A., Takeuchi, J., Ogawa, H., Umesono, K. & Yasuda, K. 1999.  
31 Efficient targeting of gene expression in chick embryos by microelectroporation.  
32 *Development, growth & differentiation*, **41**, 335-344.
- 33 Nakanoh, S., Fuse, N., Tadokoro, R., Takahashi, Y. & Agata, K. 2017. Jak1/Stat3

- 1 signaling acts as a positive regulator of pluripotency in chicken pre-gastrula  
2 embryos. *Developmental biology*, **421**, 43-51.
- 3 Nakaya, Y., Kuroda, S., Katagiri, Y. T., Kaibuchi, K. & Takahashi, Y. 2004.  
4 Mesenchymal-epithelial transition during somitic segmentation is regulated by  
5 differential roles of Cdc42 and Rac1. *Developmental cell*, **7**, 425-438.
- 6 Oginuma, M., Moncuquet, P., Xiong, F. et al. 2017. A Gradient of Glycolytic Activity  
7 Coordinates FGF and Wnt Signaling during Elongation of the Body Axis in  
8 Amniote Embryos. *Developmental cell*, **40**, 342-353.e310.
- 9 Olivera-Martinez, I., Harada, H., Halley, P. A. & Storey, K. G. 2012. Loss of  
10 FGF-dependent mesoderm identity and rise of endogenous retinoid signalling  
11 determine cessation of body axis elongation. *PLoS biology*, **10**, e1001415.
- 12 Palmeirim, I., Henrique, D., Ish-Horowicz, D. & Pourquie, O. 1997. Avian hairy gene  
13 expression identifies a molecular clock linked to vertebrate segmentation and  
14 somitogenesis. *Cell*, **91**, 639-648.
- 15 Pasteels, J. 1937. Etudes sur la gastrulation des vertébrés méroblastiques. III. Oiseaux.  
16 IV. Conclusions générales. *Arch. Biol.*, **48**, 381-488.
- 17 Saitsu, H., Yamada, S., Uwabe, C., Ishibashi, M. & Shiota, K. 2004. Development of  
18 the posterior neural tube in human embryos. *Anat Embryol (Berl)*, **209**, 107-117.
- 19 Sasai, Y. 2001. Roles of Sox factors in neural determination: conserved signaling in  
20 evolution? *The International journal of developmental biology*, **45**, 321-326.
- 21 Schoenwolf, G. C. 1979. Histological and ultrastructural observations of tail bud  
22 formation in the chick embryo. *Anat Rec*, **193**, 131-147.
- 23 Selleck, M. A. & Stern, C. D. 1991. Fate mapping and cell lineage analysis of Hensen's  
24 node in the chick embryo. *Development (Cambridge, England)*, **112**, 615-626.
- 25 Shimokita, E. & Takahashi, Y. 2011. Secondary neurulation: Fate-mapping and gene  
26 manipulation of the neural tube in tail bud. *Development, growth &*  
27 *differentiation*, **53**, 401-410.
- 28 Snell, R. S. 1995. *Clinical Anatomy for Medical Students, 5th Ed.* Little Brown & Co,  
29 Boston, Massachusetts.
- 30 Stiefel, D., Copp, A. J. & Meuli, M. 2007. Fetal spina bifida in a mouse model: loss of  
31 neural function in utero. *J Neurosurg*, **106**, 213-221.
- 32 Takemoto, T., Uchikawa, M., Kamachi, Y. & Kondoh, H. 2006. Convergence of Wnt  
33 and FGF signals in the genesis of posterior neural plate through activation of the

- 1 Sox2 enhancer N-1. *Development (Cambridge, England)*, **133**, 297-306.
- 2 Taniguchi, Y., Kurth, T., Weiche, S. et al. 2017. The posterior neural plate in axolotl  
3 gives rise to neural tube or turns anteriorly to form somites of the tail and  
4 posterior trunk. *Developmental biology*, **422**, 155-170.
- 5 Tsakiridis, A., Huang, Y., Blin, G. et al. 2014. Distinct Wnt-driven primitive streak-like  
6 populations reflect in vivo lineage precursors. *Development (Cambridge,*  
7 *England)*, **141**, 1209-1221.
- 8 Tucker, A. S. & Slack, J. M. 1995. Tail bud determination in the vertebrate embryo.  
9 *Curr Biol*, **5**, 807-813.
- 10 Tzouanacou, E., Wegener, A., Wymeersch, F. J., Wilson, V. & Nicolas, J. F. 2009.  
11 Redefining the progression of lineage segregations during mammalian  
12 embryogenesis by clonal analysis. *Developmental cell*, **17**, 365-376.
- 13 Uchikawa, M., Yoshida, M., Iwafuchi-Doi, M. et al. 2011. B1 and B2 Sox gene  
14 expression during neural plate development in chicken and mouse embryos:  
15 universal versus species-dependent features. *Development, growth &*  
16 *differentiation*, **53**, 761-771.
- 17 Watanabe, T., Saito, D., Tanabe, K. et al. 2007. Tet-on inducible system combined with  
18 in ovo electroporation dissects multiple roles of genes in somitogenesis of  
19 chicken embryos. *Developmental biology*, **305**, 625-636.
- 20 Wymeersch, F. J., Huang, Y., Blin, G. et al. 2016. Position-dependent plasticity of  
21 distinct progenitor types in the primitive streak. *Elife*, **5**, e10042.
- 22 Yoshida, M., Uchikawa, M., Rizzoti, K., Lovell-Badge, R., Takemoto, T. & Kondoh, H.  
23 2014. Regulation of mesodermal precursor production by low-level expression  
24 of B1 Sox genes in the caudal lateral epiblast. *Mechanisms of development*, **132**,  
25 59-68.
- 26 Yoshino, T., Saito, D., Atsuta, Y. et al. 2014. Interepithelial signaling with nephric duct  
27 is required for the formation of overlying coelomic epithelial cell sheet.  
28 *Proceedings of the National Academy of Sciences of the United States of*  
29 *America*, **111**, 6660-6665.

30  
31  
32

1 **Figure legends**

2 **Figure 1**

3 Segregation of SN- and mesoderm-fated cells in the tail bud at HH14. (A) A  
4 fate map of the HH8 epiblast caudal to the Hensen's node (HN) modified from  
5 Shimokita and Takahashi (2011). A specific region called presumptive secondary  
6 neurulation (preSN, purple) gives rise solely to secondary neurulation (SN), which  
7 undergoes posteriorly to 27<sup>th</sup> somite level. The EGFP-positive neural tube anterior to  
8 27<sup>th</sup> is of primary neurulation. (B) *In ovo* electroporation conducted at HH8 (see also  
9 Materials and Methods). (C, D) EGFP-electroporated preSN gave rise to EGFP-positive  
10 cells in the SN-forming cells but not in the mesoderm as seen at HH14 and HH17. (E)  
11 Simultaneous labeling by different colors of PKHs of preSN and anterior primitive  
12 streak (mesoderm) in a single embryo. (F) Dorsal view, and (G-I) sagittal sections at  
13 HH14. Little overlapping between SN (green)- and mesoderm (red)-fated cells in the  
14 tail bud. CNH, notochord and floor plate were unlabeled. (J) Schematic trace of SN- and  
15 mesodermal precursors in the tail bud. NT, neural tube; TB, tail bud; CNH, chord neural  
16 hinge; NC, notochord, \*, background. Scale bar; 100  $\mu$ m.

17

18 **Figure 2**

19 Transplantation with SN-fated cells revealed self-renewing cells in the  
20 posterior half of the SN-territory. (A-E) EGFP-expressing SN-fated cells were dissected  
21 from the tail bud of HH17 embryo, and transplanted into a corresponding region of the  
22 tail bud of HH14 embryos. (F-H) When the host embryo developed to HH17, similar  
23 transplantation was repeated. (I) The EGFP-positive SN precursor territory in the tail  
24 bud was subdivided into the anterior and posterior halves, and each of them was  
25 isotopically transplanted into a host embryo (HH14). (J-L) The anterior SN precursors  
26 underwent neural tube differentiation without remaining in the tail bud (bracket). (M-O)  
27 The posterior SN precursors underwent not only neural tube differentiation, but also  
28 remained as mesenchymal cells in the tail bud (white arrowheads). A white small dot  
29 indicates the position of 31-33 somite level. White arrow is the boundary between the  
30 posterior end of epithelialized neural tube and mesenchymal SN precursors of the tail  
31 bud.

32

33

1 **Figure 3**

2 Graded expression levels of Sox2 in the SN precursor territory in the HH14  
3 tail bud. (A, B) *In situ* hybridization for Sox2 mRNA. Dorsal view (A) and sagittal  
4 section (B). (C-D) Immunohistochemistry for Sox2 and Brachyury (T) proteins in a  
5 para-sagittal section. (F, G) Graded expression of Sox2 was quantitatively shown,  
6 whereas the expression level of Brachyury was largely steady in the tail bud. (I-K) The  
7 Sox2-positive area overlaps with the SN-fated territory, but not with mesodermal cells  
8 derived from the anterior primitive streak (PKH67-labeled). Scale bar; 100  $\mu$ m.

9  
10 **Figure 4**

11 An experimentally augmented level of Sox2 caused precocious differentiation  
12 of SN precursors. (A) Sox2 cDNA was overexpressed in a temporally controlled manner  
13 using the Tet-on system. The preSN region of HH8 embryos was electroporated with  
14 the plasmids indicated. When the embryo reached HH14, at which gene-electroporated  
15 cells emerged as mesenchyme in the forming tail bud, a Dox solution was administered  
16 (0hr). Note that at 3 hrs post-Dox in both control and Sox2-overexpressing embryos,  
17 three types of cells, green (EGFP), red (mCherry) and yellow (EGFP and mCherry)  
18 were observed in the tail bud (see text for details). However, at 9 hrs,  
19 Sox2-overexpressing cells were found solely in the formed neural tube, and not in the  
20 tail bud.

21  
22 **Figure 5**

23 Sox2-deprived SN precursors failed to participate in the secondary  
24 neurulation. (A) *In ovo* electroporation and tet-on induced expression of Sox3HMG-EnR  
25 were carried out in a way similar to that shown in Fig. 4. In addition, Sox2-deprived SN  
26 precursors were precisely tracked following isotopic transplantation. (B) At the time of  
27 transplantation (0 hr), no signal for the expression of Sox3HMG-EnR was seen yet. (C)  
28 By 12 hrs post Dox, Sox3HMG-EnR-expressing SN precursors cells (red), whose  
29 number was smaller than that of control (EGFP) cells, failed to be incorporated into the  
30 secondary neural tube formation (E, F). (G, H) In the posterior region of the SN  
31 precursor territory, no Sox3HMG-EnR-expressing cells were observed. Scale bar; 50  
32  $\mu$ m.

33

1 **Figure 6**

2 A summary diagram of the SN precursors in the tail bud of chicken embryos.  
3 SN-fated cells populate the anterior half of the mesenchymal mass of the tail bud,  
4 whereas the rest of the tail bud is populated by mesodermal precursors (paraxial  
5 mesoderm) and chord neural hinge (CNH). The SN precursor territory (light blue) is  
6 further divided into two subpopulations: self-renewing cells posteriorly and more  
7 neural-specified transitional cells anteriorly. Sox 2 displays posteriorly decreasing  
8 levels of expression in the SN precursor territory. High and low levels of Sox 2 are  
9 important for neural differentiation/epithelialization of transitional zone, and survival of  
10 self-renewing cells, respectively.

11

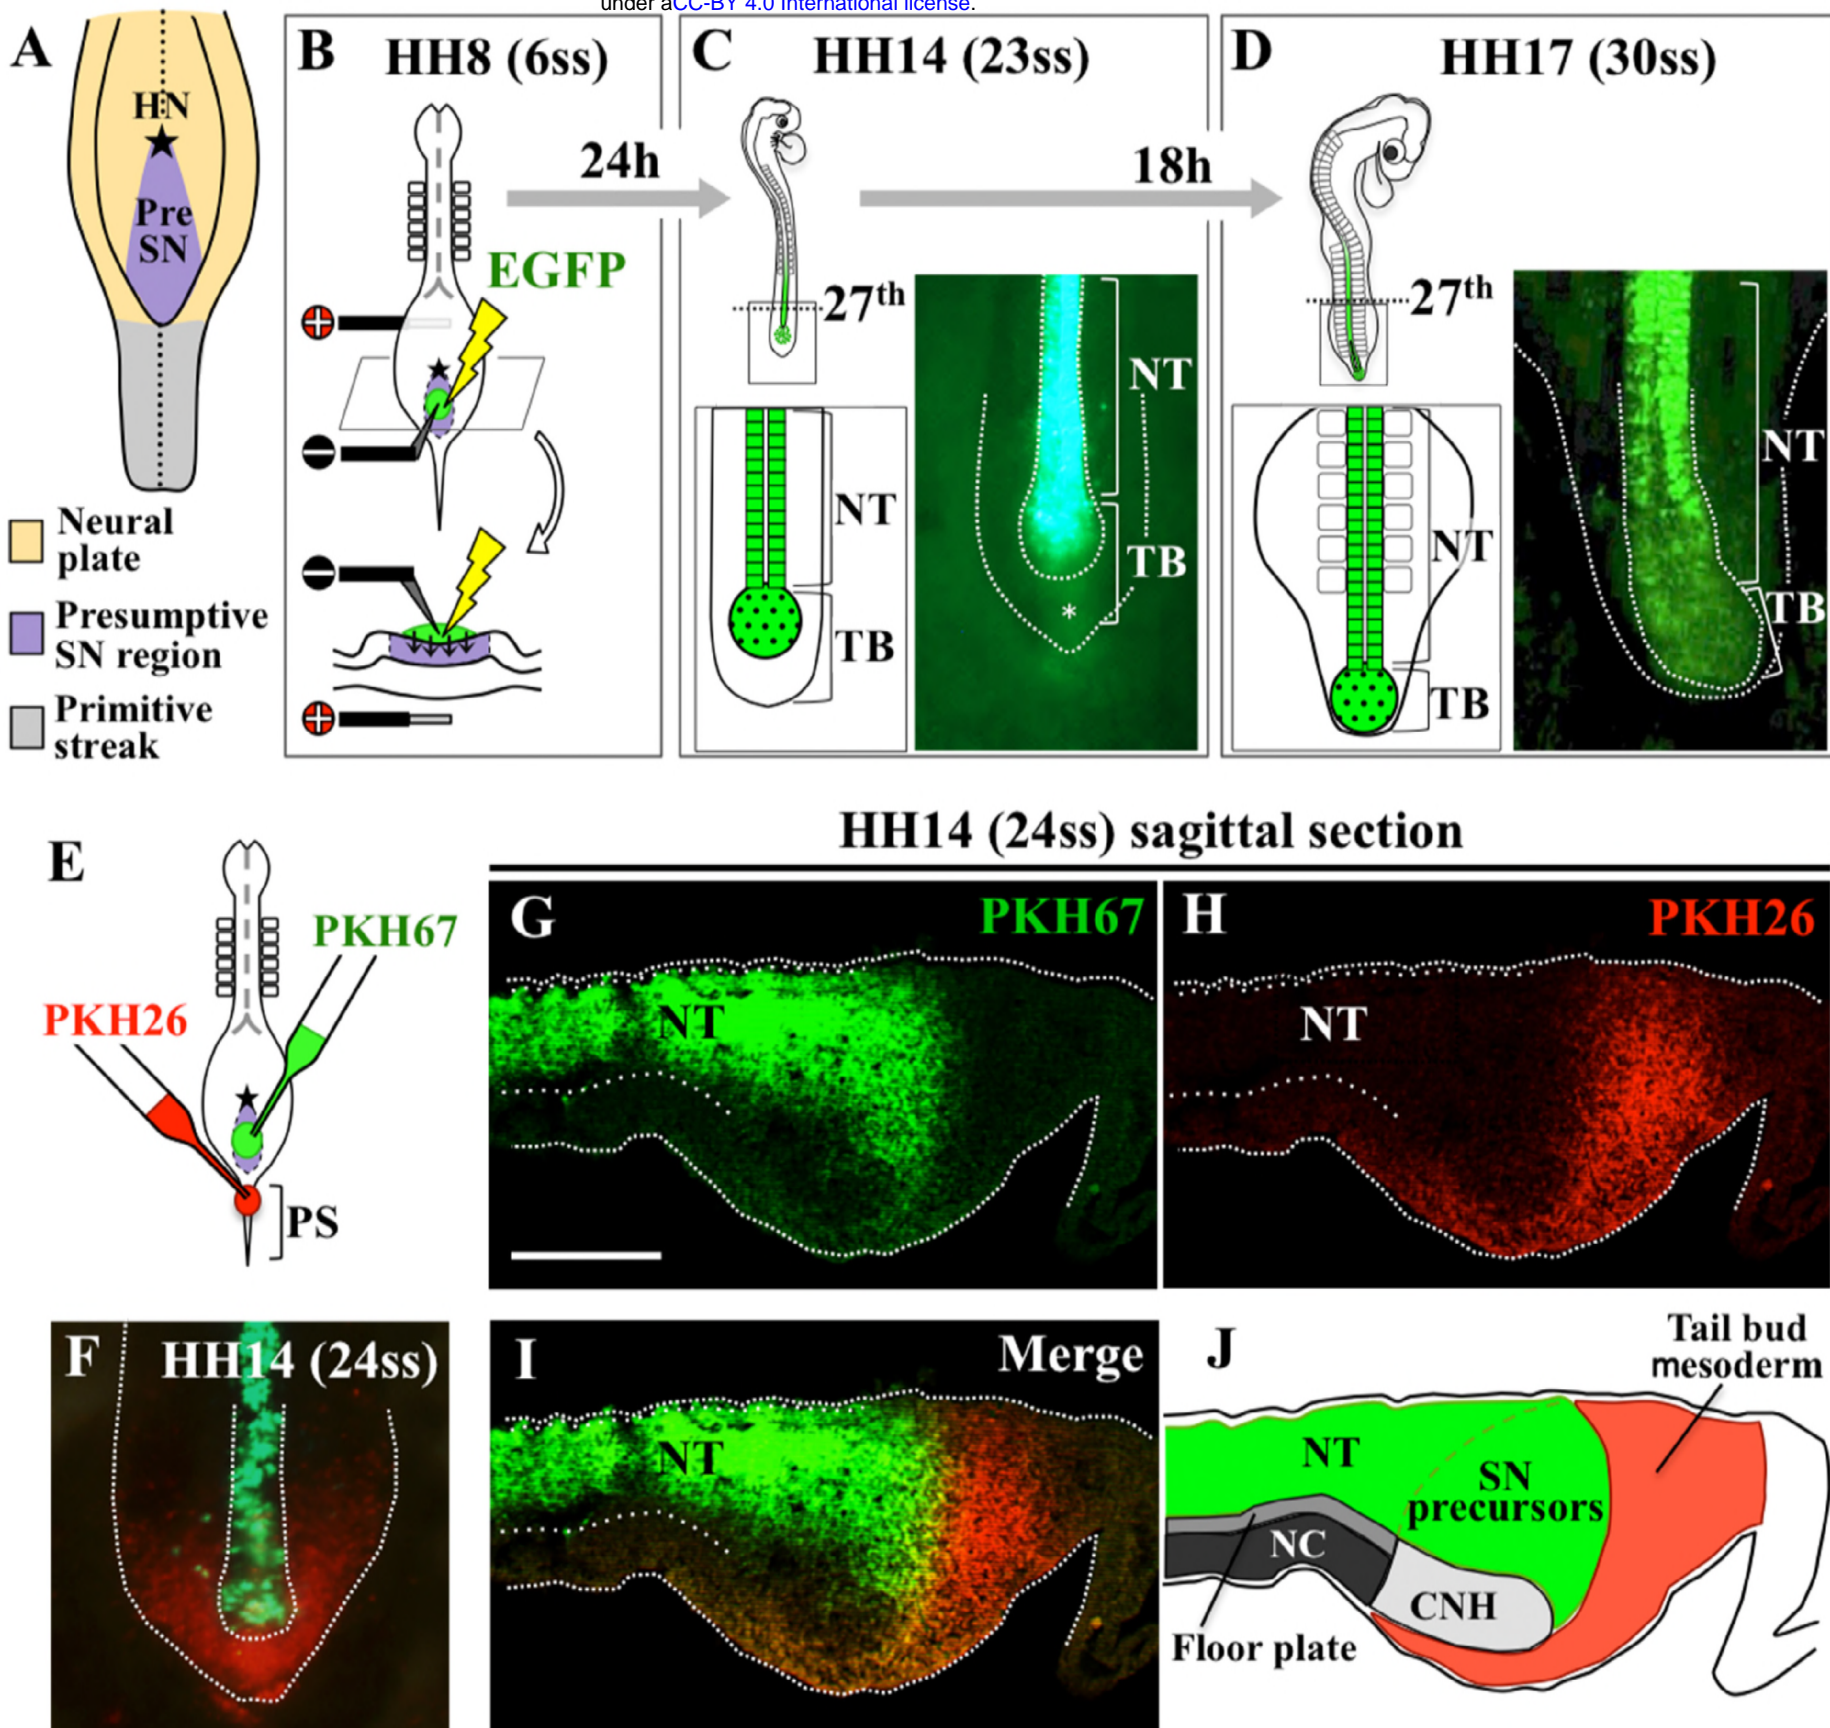

Fig. 1 Kawachi et al.

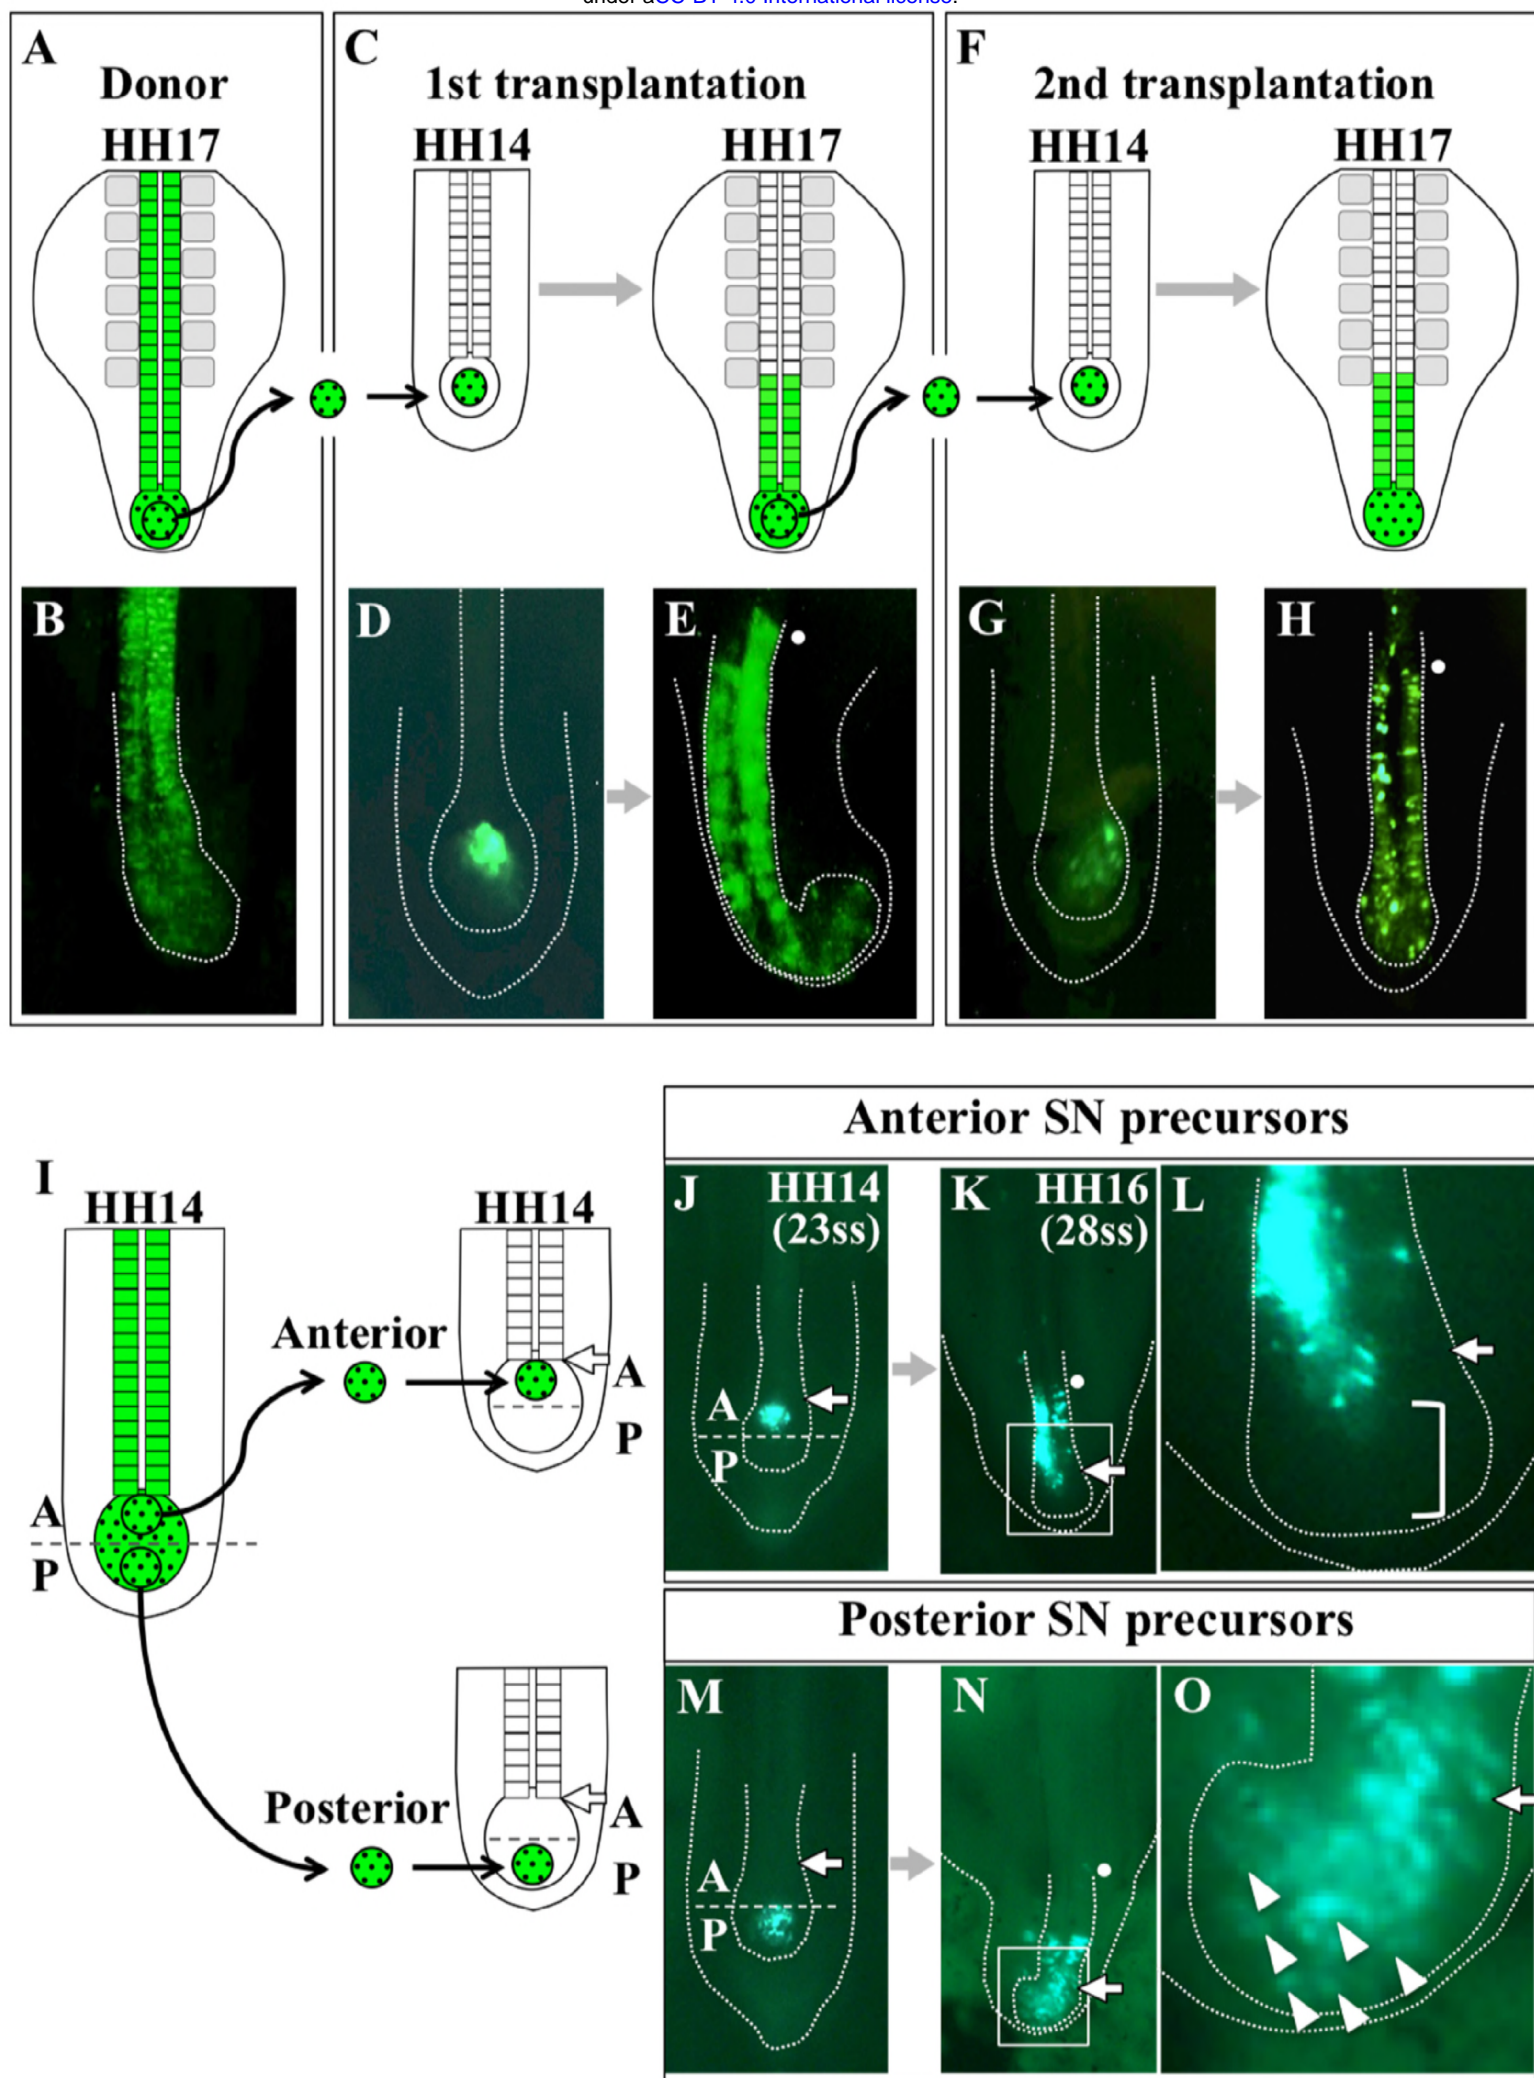

Fig. 2 Kawachi et al.



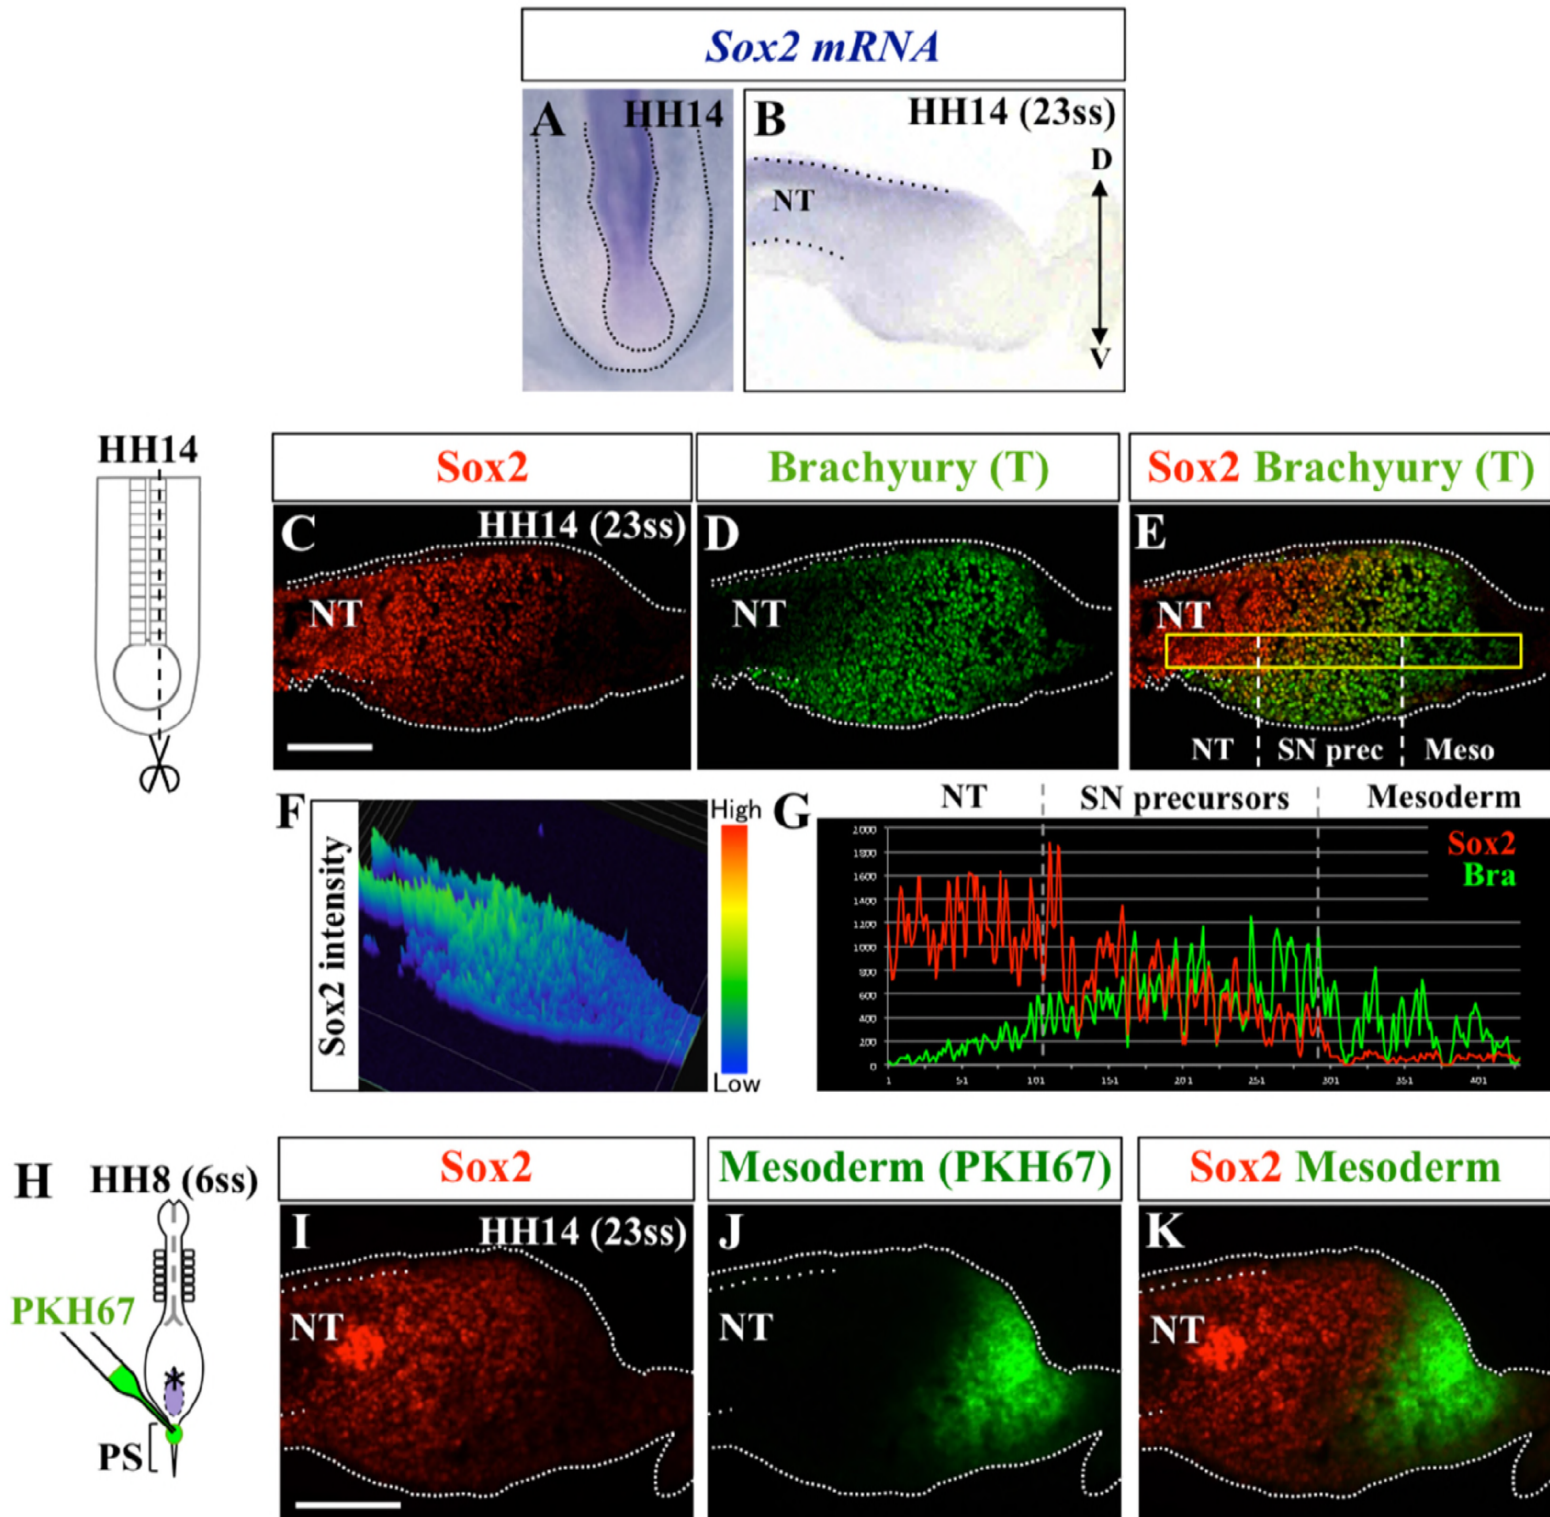

Fig. 3 Kawachi et al.

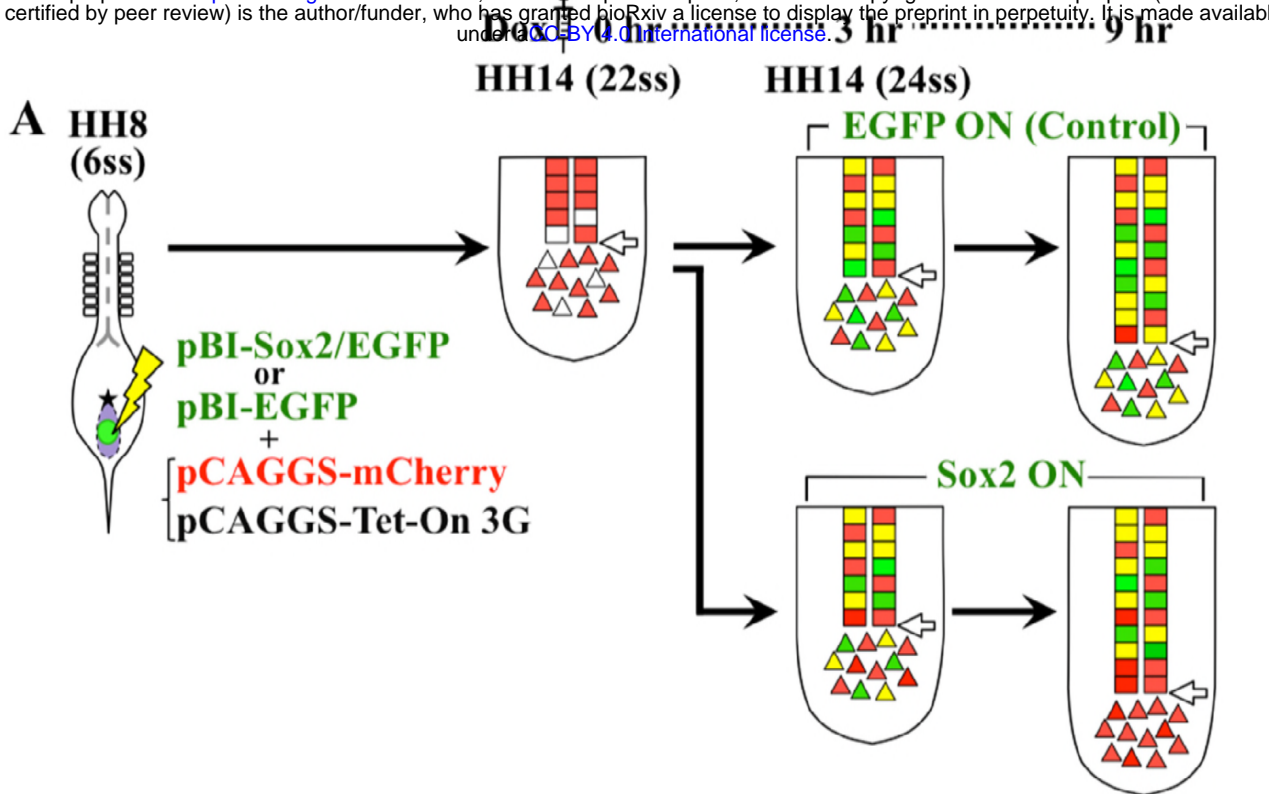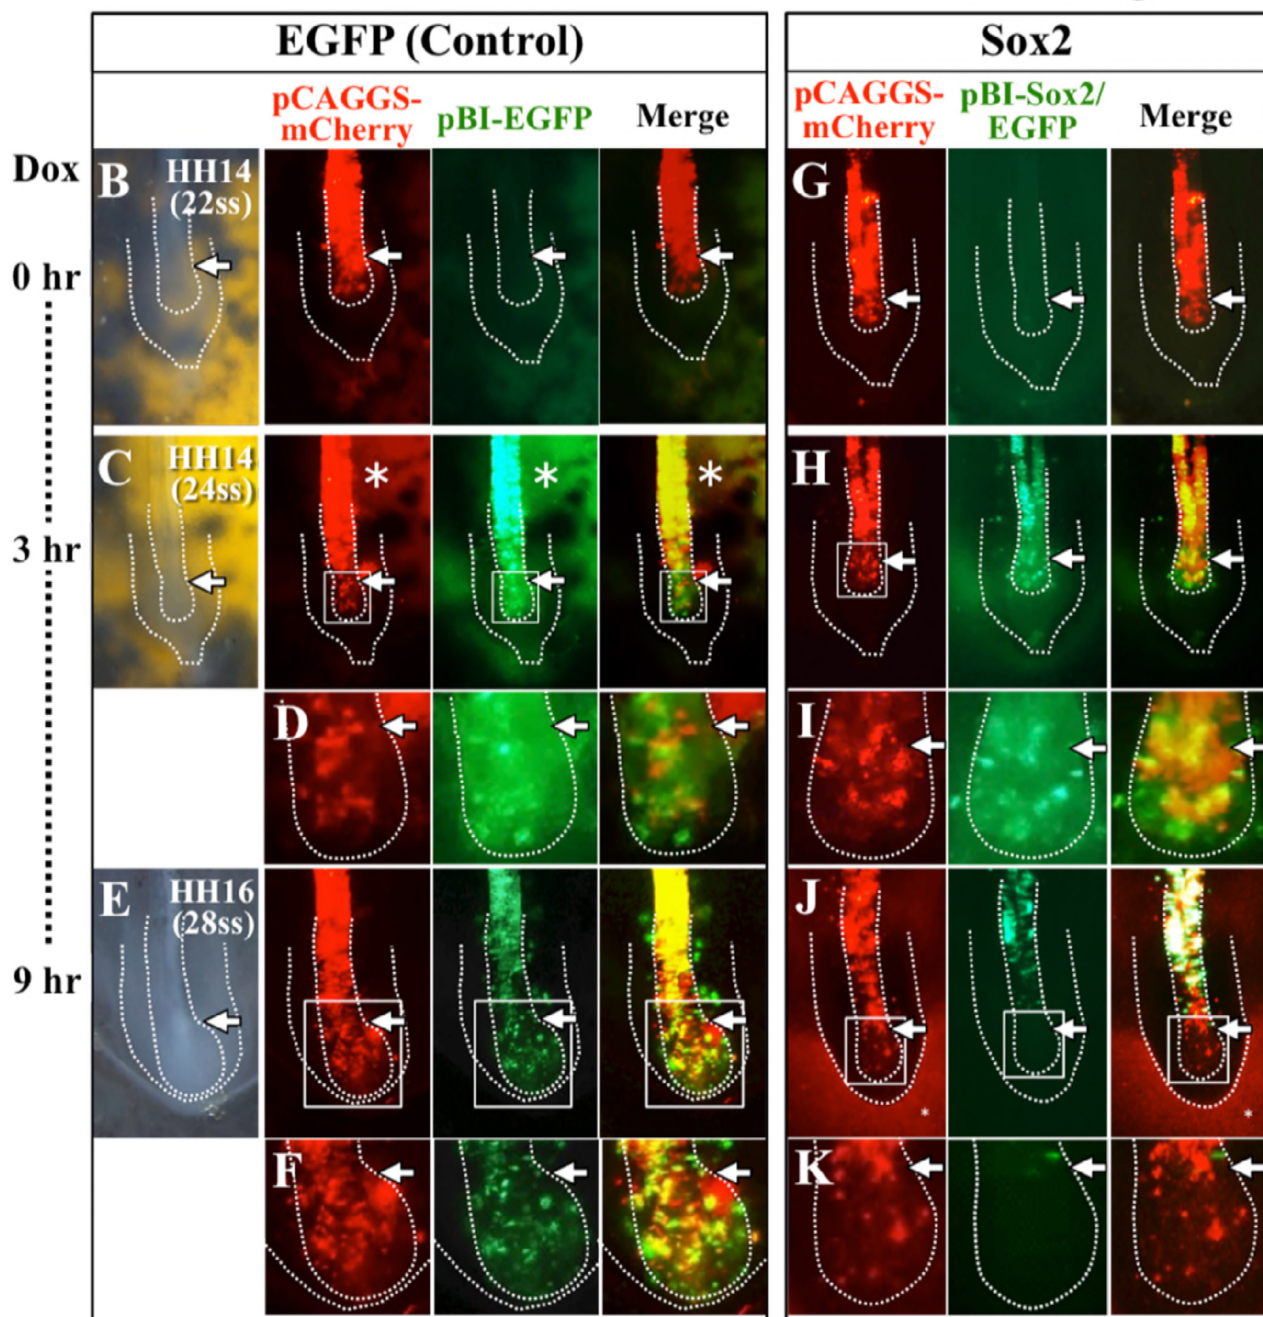

Fig. 4 Kawachi et al.

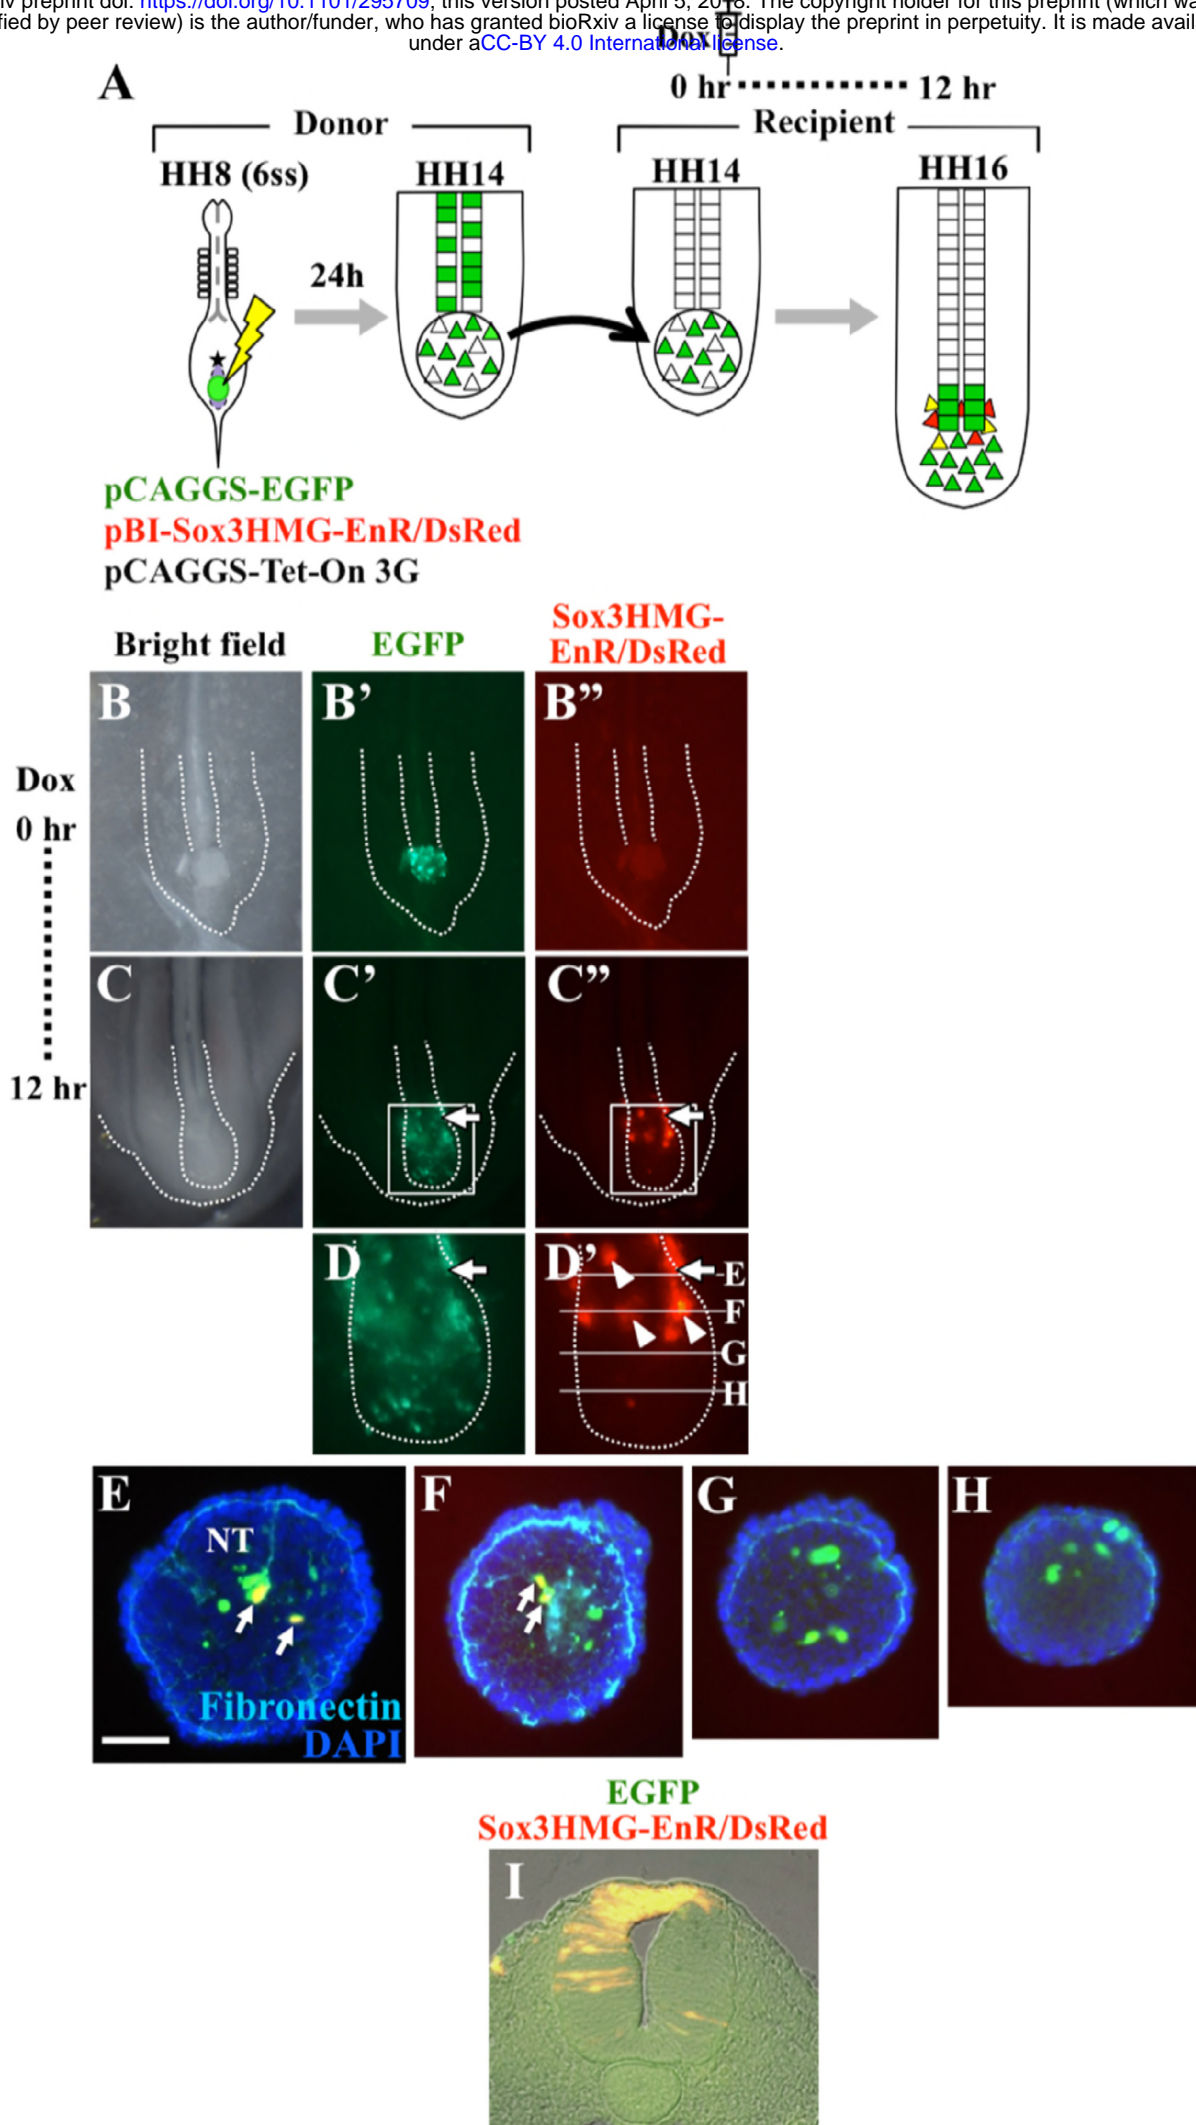

Fig. 5 Kawachi et al.

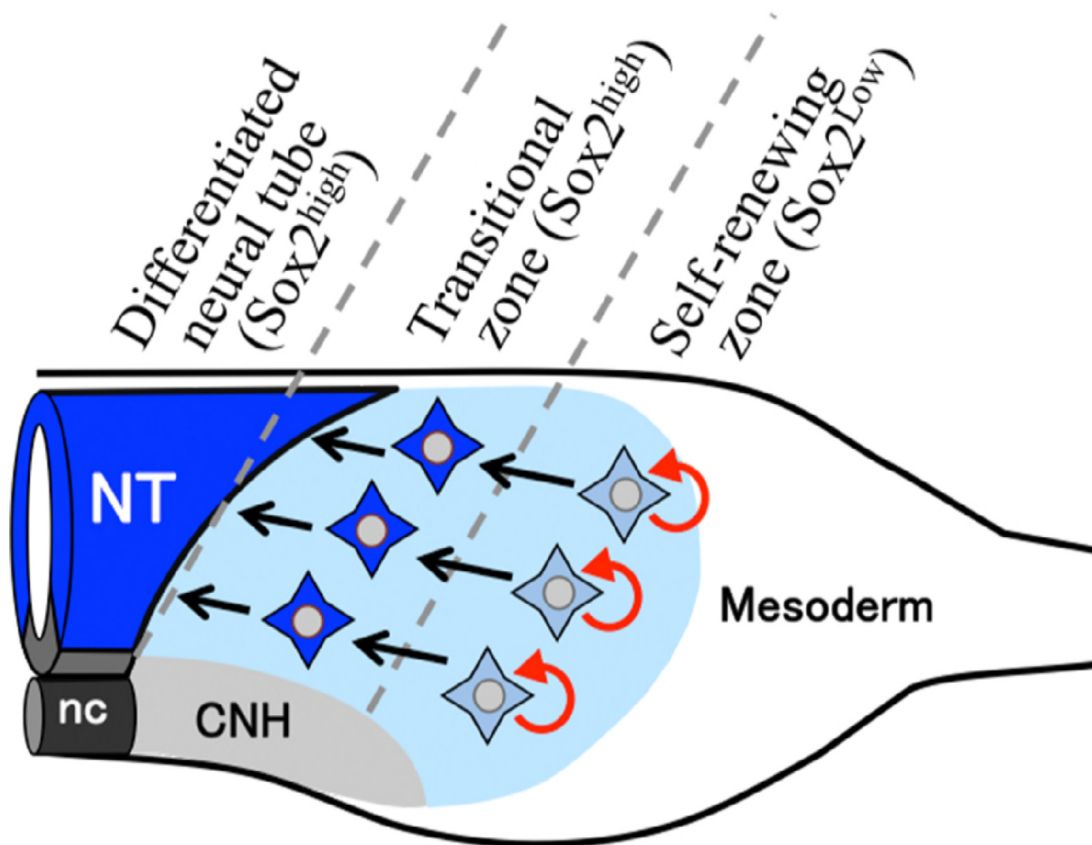

Fig. 6 Kawachi et. al.
